# Supplementary material
Source: PubMed Central journal article supplement (PMC5070649)
Supplement: NIHMS775819-supplement-1.pdf [file NIHMS775819-supplement-1.pdf]

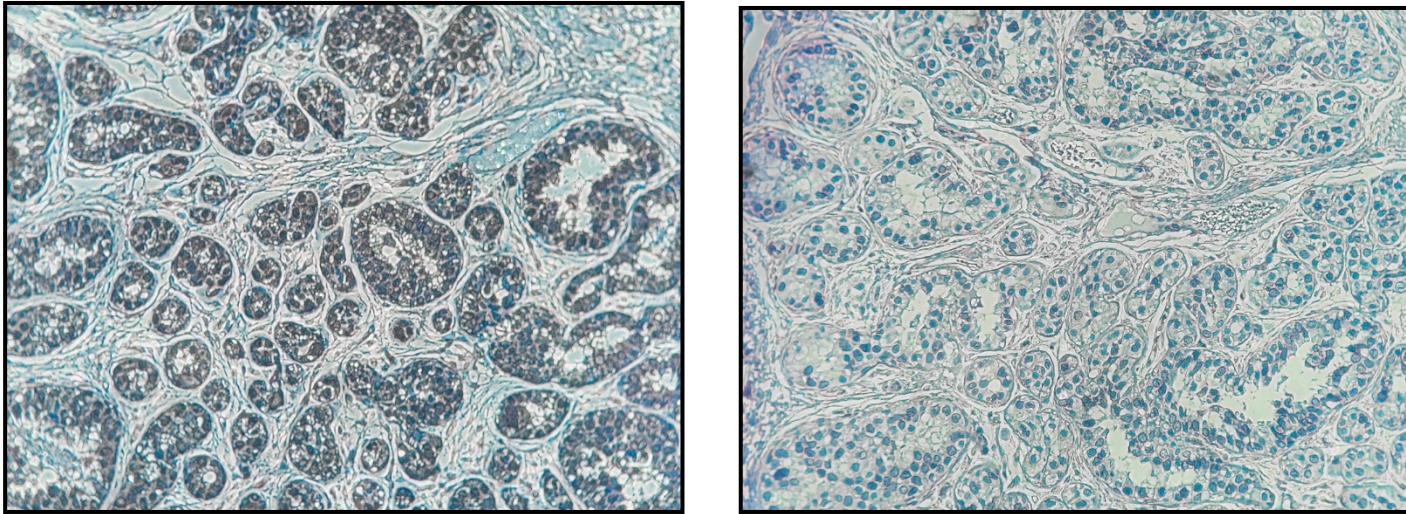

**Fig. S1. Negative controls for IHC staining of CX3CR1 in human tissues.** Tissue sections of primary breast adenocarcinoma showed a strong immunoreactivity to the CX3CR1 antibody (left); the staining was completely abolished by pre-incubating the antibody with a blocking peptide prior to incubation with the tissue sections (right). Magnification: 200x.
