# Supplementary material
Source: PubMed Central journal article supplement (PMC5070649)
Supplement: NIHMS775819-supplement-2.pdf [file NIHMS775819-supplement-2.pdf]

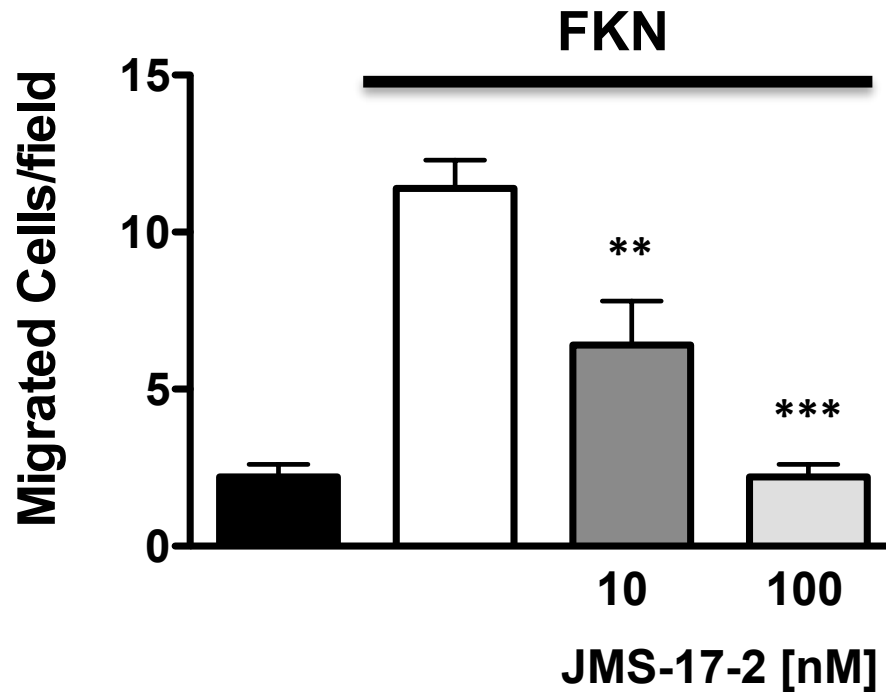

**Fig. S2. Effects of CX3CR1 antagonism on migration of breast cancer cells.** In chemotaxis experiments, cancer cells were plated in the upper chamber in the absence or presence of JMS-17-2, with the lower chamber containing 50nM FKN. The CX3CR1 antagonist inhibited the migration of cancer cells in a dose-dependent manner. \*\*  $p=0.07$ ; \*\*\*  $p<0.0001$ .
