# Supplementary material
Source: PubMed Central journal article supplement (PMC5070649)
Supplement: NIHMS775819-supplement-3.pdf [file NIHMS775819-supplement-3.pdf]

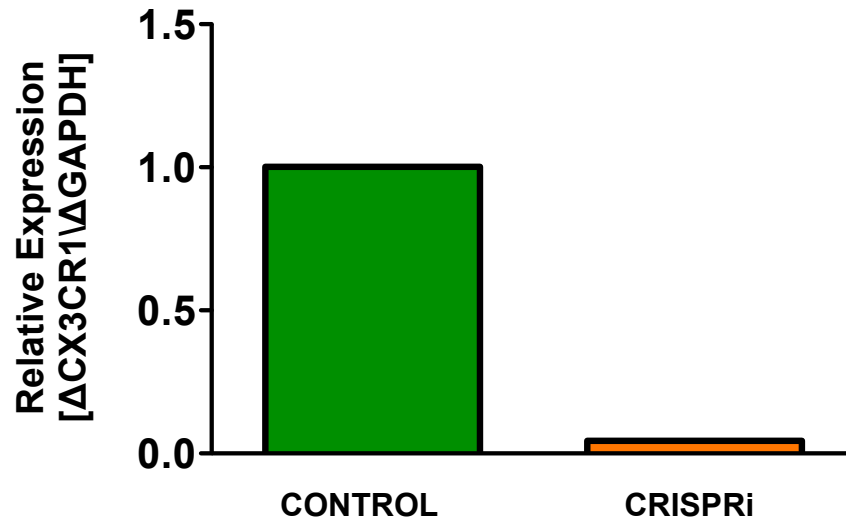

**Fig. S3. Validation of CX3CR1 silencing by CRISPRi in animal tumors.** Tissue specimens harvested by Laser Capture Microdissection from skeletal tumors generated in mice were tested for CX3CR1 expression at the transcriptional level by qRT-PCR. The results confirm the almost complete gene silencing achieved using CRISPRi.
