# Supplementary material
Source: PubMed Central journal article supplement (PMC5070649)
Supplement: NIHMS775819-supplement-4.pdf [file NIHMS775819-supplement-4.pdf]

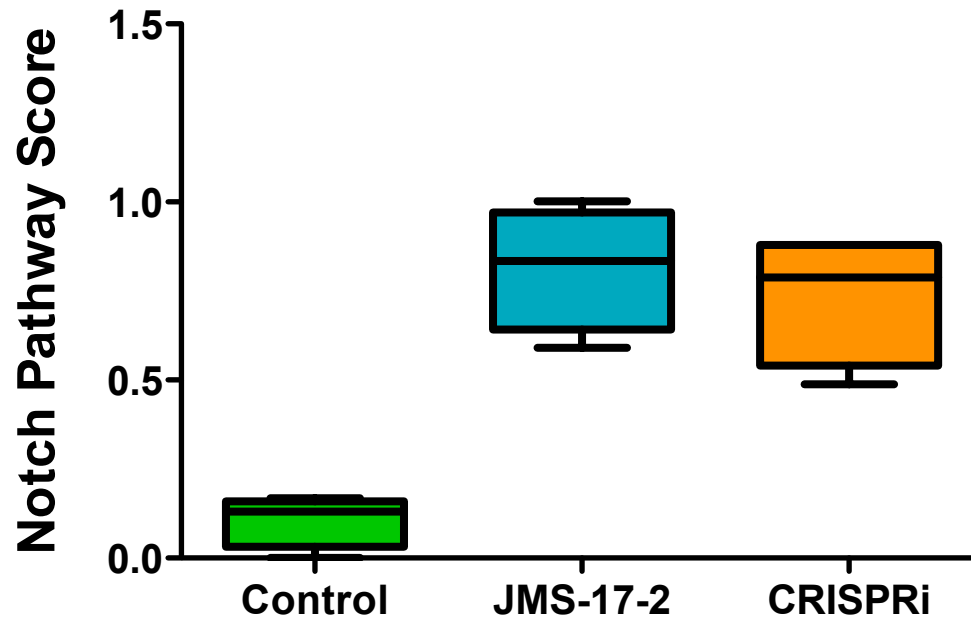

**Fig. S4. Nanostring Pathway score for Notch signaling pathway .** Tissue specimens harvested by Laser Capture Microdissection from skeletal tumors generated in mice either administered with JMS-17-2 or grafted with cells silenced for CX3CR1 by CRISPRi show similar de-regulation of the Notch pathway, established using the Pathfier analysis module, as compared to vehicle-treated control animals.
